# Supplementary material
Source: publisher figshare collection journal article supplement (https://acs.figshare.com/ndownloader/files/34145754)
Supplement: Supplementary file 1 [file 34145754]

# Supporting Information

## Evaluation of Nitric Oxide Fluctuation *via* a Fast-responsive Fluorescent Probe in Idiopathic Pulmonary Fibrosis Cell and Mice Models

Feifei Xu, † Qing Wang, † Ling Jiang, † Fawei Zhu, † Lei Yang, †\* Shusheng Zhang †\*  
and Xiangzhi Song ‡\*

†Collaborative Innovation Center of Tumor Marker Detection Technology, Equipment and Diagnosis-Therapy Integration in Universities of Shandong, Shandong Provincial Key Laboratory of Detection Technology for Tumor Markers, College of Chemistry and Chemical Engineering, Linyi University, Linyi 276005, China.

‡College of Chemistry & Chemical Engineering, Central South University, Changsha, Hunan 410083, China.

\*Corresponding authors:

Lei Yang: Tel: +86-539-7258620. E-mail: [yanglei@lyu.edu.cn](mailto:yanglei@lyu.edu.cn)

Shusheng Zhang: Tel: +86-539-8766107. Email: [shushzhang@126.com](mailto:shushzhang@126.com)

Xiangzhi Song: Tel: +86-731-88836954. Email: [xzsong@csu.edu.cn](mailto:xzsong@csu.edu.cn)

### Table of Contents

|                                 |    |
|---------------------------------|----|
| 1. Table S1.....                | S2 |
| 2. Table S2.....                | S3 |
| 3. Experimental Procedures..... | S4 |
| 4. Supplementary Figures .....  | S6 |

**1. Table S1** Fluorescent probes for IPF.

| Probe                                                                               | Response time (min) | analyte                       | Stokes shift (nm) | detection limit | Literature                                |
|-------------------------------------------------------------------------------------|---------------------|-------------------------------|-------------------|-----------------|-------------------------------------------|
| 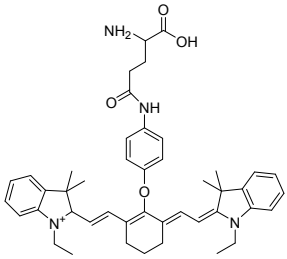   | 30                  | GGT                           | 10                | 7.6 mU/L        | Sensor. Actuat. B-Chem. 2020, 322, 128565 |
|    | 4                   | ONOO <sup>-</sup>             | 160               | 85 nM           | Anal. Chem. 2019, 91, 11461-11466         |
|    | 15                  | GSTs                          | 80                | 10 µg/L         | Anal. Chem. 2019, 91, 5424-5432           |
|   | 60                  | COX-2                         | 120               | 11 µg/L         | J. Mater. Chem. B, 2021, 9, 6226-6233     |
|  | 60                  | NO                            | 14                | 57 nM           | Anal. Chem. 2020, 92, 699-706             |
|  | 25                  | H <sub>2</sub> O <sub>2</sub> | 30                | 100 nM          | ACS Sens. 2021, 6, 1228-1239              |
|  | 1                   | NO                            | 198               | 17 nM           | This work                                 |

**2. Table S2** Fluorescent probes for NO.

| Probe                                                                               | Response time (min) | Stokes shift (nm) | detection limit | Literature                               |
|-------------------------------------------------------------------------------------|---------------------|-------------------|-----------------|------------------------------------------|
| 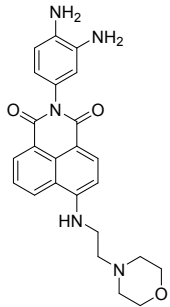   | -                   | 90                | 5 nM            | J. Am. Chem. Soc. 2012, 134, 17486-17489 |
|    | 1.5                 | 19                | 14 nM           | Anal. Chem. 2017, 89, 9620-9624          |
|   | 0.3                 | 39                | 47.6 nM         | ACS Sens. 2019, 4, 309-316               |
|  | 30                  | 23                | 56 nM           | Anal. Chem. 2019, 91, 4301-4306          |
|  | <1                  | 179               | 242 nM          | Anal. Chem. 2020, 92, 5064-5072          |
|  | <1                  | 35                | 0.12 nM         | Chem. Sci., 2017, 8, 6857-6864           |
|  | 2                   | 140               | 37 nM           | Chem. Sci., 2017, 8, 4533-4538           |

Chemical reaction scheme showing the synthesis of DCM-NO from DCM-NH<sub>2</sub>:

Starting material: DCM-NH<sub>2</sub> (2-amino-4-(dimethylaminomethyl)-6-methylphenol).

Reagents:

- (1) Triphosgene
- (2) Hydrazine hydrate
- (3) 4-nitrophenyl isothiocyanate

Product: DCM-NO (2-(4-nitrophenylthio)-4-(dimethylaminomethyl)-6-methylphenol).

The reaction scheme illustrates the synthesis of DCM-NH<sub>2</sub> from DCM-NO. The starting material, DCM-NO, is a 2,2-dicyanovinyl-6-(4-nitrophenyl)-2H-chromene derivative. It reacts with NO + O<sub>2</sub> to form an intermediate, which is a 2,2-dicyanovinyl-6-(4-nitrophenyl)-2H-chromene derivative with a 4-nitrophenylhydrazine group. This intermediate then undergoes hydrolysis to yield the final product, DCM-NH<sub>2</sub>, which is a 2,2-dicyanovinyl-6-(4-aminophenyl)-2H-chromene derivative.

## Materials and Instruments.

S4

### **Preparation of Analytes.**

The testing solutions of NaClO, H<sub>2</sub>O<sub>2</sub>, Na<sub>2</sub>S, Cys, Hcy, GSH, MgCl<sub>2</sub>, CaCl<sub>2</sub>, CuSO<sub>4</sub>, (CH<sub>3</sub>COO)<sub>2</sub>Pb, FeCl<sub>2</sub>, FeCl<sub>3</sub>, ZnCl<sub>2</sub>, Na<sub>2</sub>CO<sub>3</sub>, NaNO<sub>2</sub>, NaNO<sub>3</sub>, KOH, Na<sub>2</sub>SO<sub>3</sub>, KI were prepared by dissolving or diluting each of them in double-distilled water. ONOO<sup>-</sup> was prepared according to previous literature and the concentrated was determined by absorbance at 302 nm. Hydroxyl radical (•OH) was generated in the Fenton system from FeSO<sub>4</sub> and H<sub>2</sub>O<sub>2</sub>. [1]

### **H&E and Masson Staining**

Histology analysis of lung from each group was carried out by sacrificing the mice. The lungs were fixed in 10% paraformaldehyde solution, and then embedded in paraffin. The lung sections were observed by an optical microscope after stained with H&E and Masson.

### **Imaging of NO in Lung Sections**

Lung sections of each group were cultured with probe **DCM-NO** (10 μM ) for 30 min, washed three times with PBS and imaged with confocal laser scanning microscope.

#### 4. Supplementary Figures

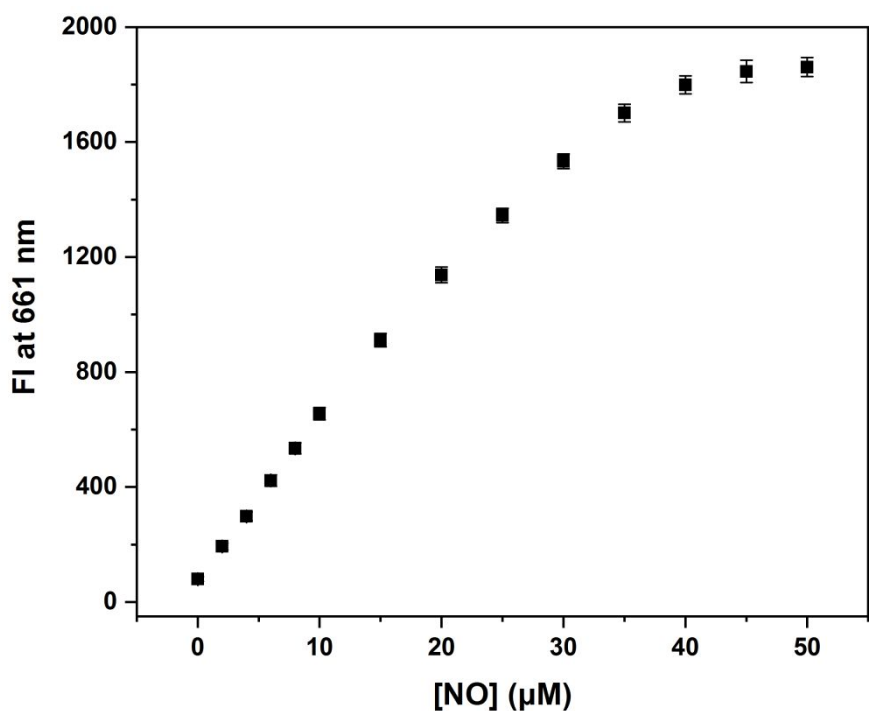

**Figure S1.** Plot of emission intensity at 661 nm of probe **DCM-NO** (10 μM) upon the addition of NO (0-50 μM) in PBS buffer (10 mM, pH 7.4, including 30% DMSO).

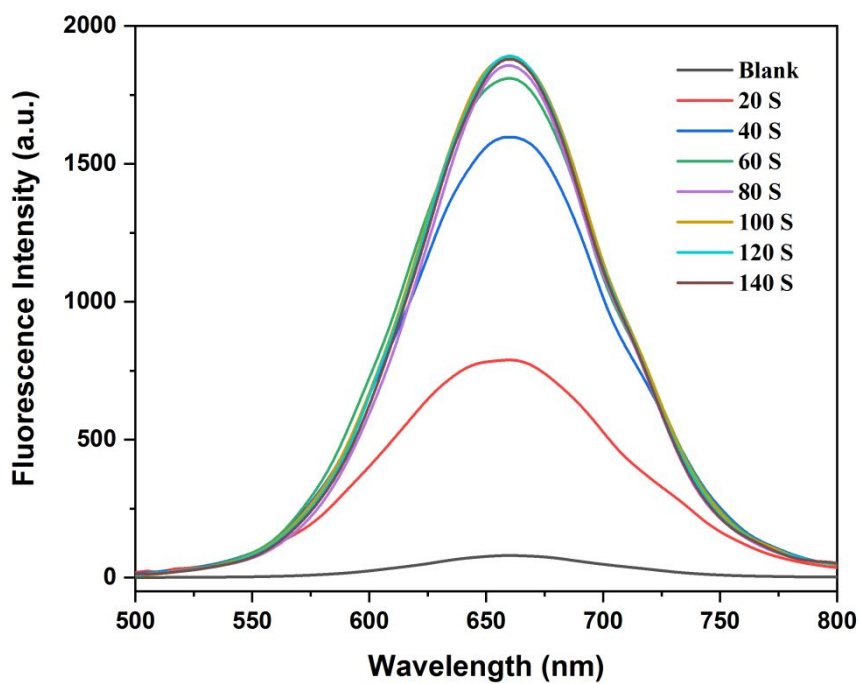

**Figure S2.** Time-dependent fluorescence spectra of probe **DCM-NO** (10 μM) with NO (50 μM) in PBS buffer (10 mM, pH 7.4, including 30% DMSO).

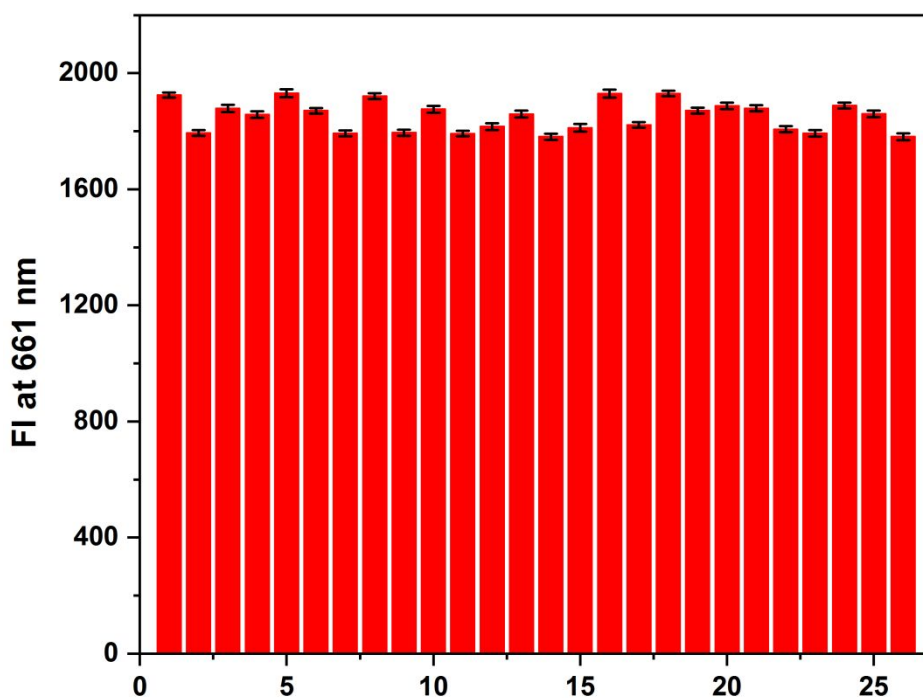

**Figure S3** Fluorescence intensity of probe **DCM-NO** (10  $\mu$ M) with NO (50  $\mu$ M) in the presence of various relevant analytes (50  $\mu$ M) in PBS buffer (10 mM, pH 7.4, including 30% DMSO). The analytes include  $\text{Na}^+$ ,  $\text{Mg}^{2+}$ ,  $\text{Ca}^{2+}$ ,  $\text{K}^+$ ,  $\text{Cu}^{2+}$ ,  $\text{Fe}^{2+}$ ,  $\text{Fe}^{3+}$ ,  $\text{Zn}^{2+}$ ,  $\text{Pb}^{2+}$ ,  $\text{AcO}^-$ ,  $\text{SO}_4^{2-}$ ,  $\text{CO}_3^{2-}$ ,  $\text{NO}_2^-$ ,  $\text{Cl}^-$ ,  $\text{NO}_3^-$ ,  $\text{OH}^-$ ,  $\text{SO}_3^{2-}$ ,  $\text{I}^-$ ,  $\text{S}^{2-}$ , Cys, Hcy, GSH,  $\text{ClO}^-$ ,  $\text{ONOO}^-$ ,  $\text{H}_2\text{O}_2$ ,  $\bullet\text{OH}$ .

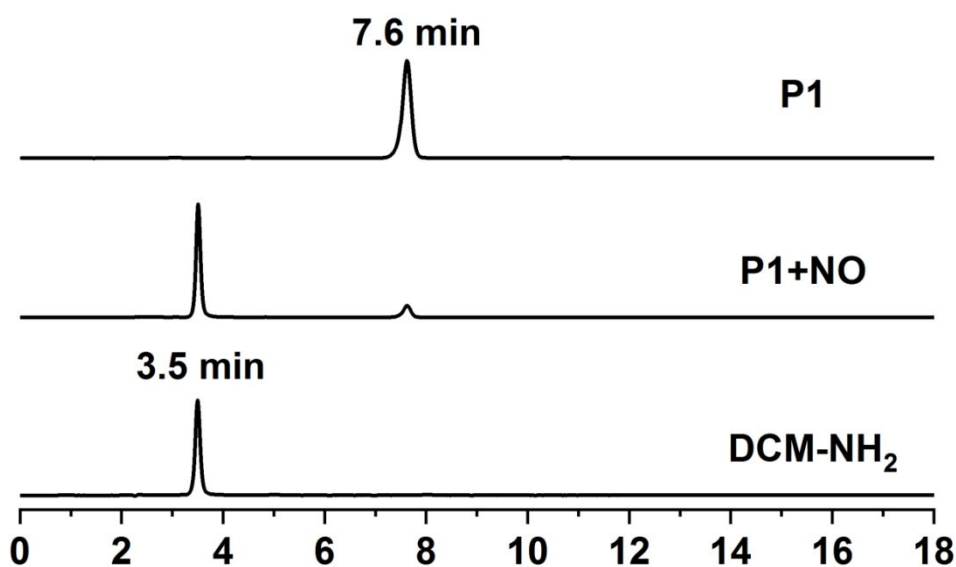

**Figure S4.** HPLC chromatograms of probe **DCM-NO**, compound **DCM-NH<sub>2</sub>**, and the reaction mixture of probe **DCM-NO** with NO. Conditions: eluent,  $\text{H}_2\text{O}/\text{CH}_3\text{CN}$  (v/v, 1/9), flow rate, 0.8 mL/min; temperature, 25  $^\circ\text{C}$ ; detection wavelength, 455 nm; injection volume, 10  $\mu\text{L}$ .

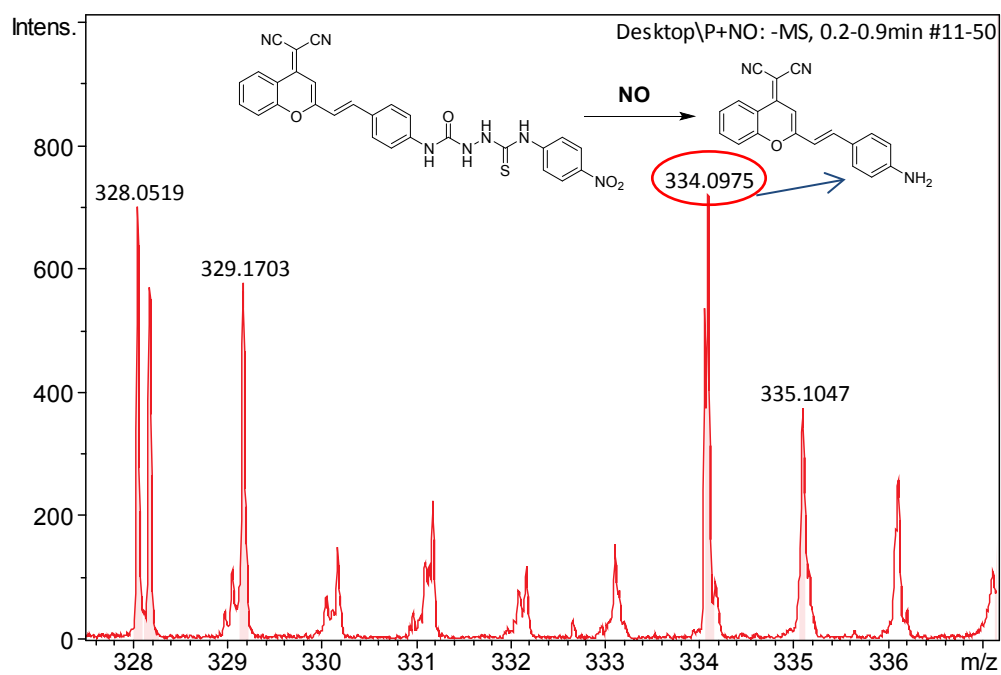

**Figure S5.** HRMS spectrum of the reaction product from probe **DCM-NO** with NO.

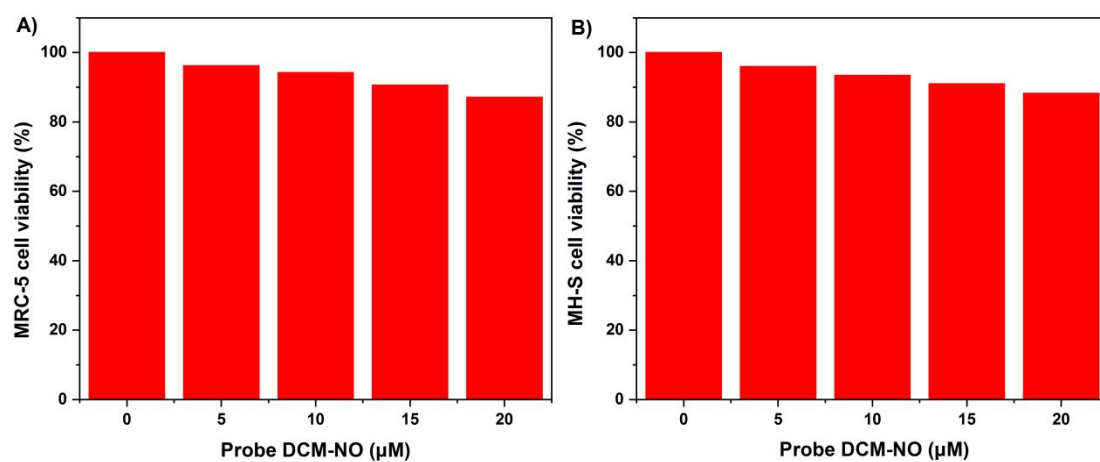

**Figure S6.** Cytotoxicity assay of probe **DCM-NO** at different concentration for MRC-5 (A) and MH-S (B) cells.



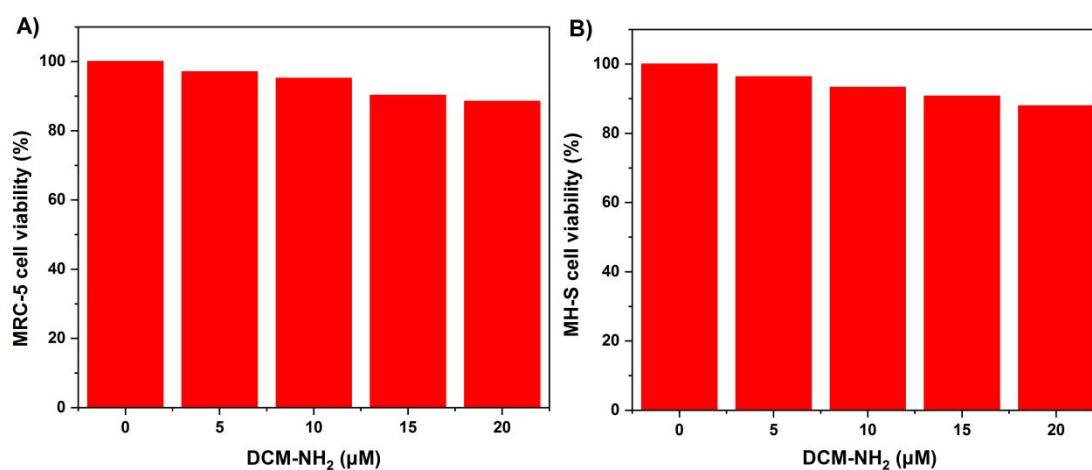

**Figure S7.** Cytotoxicity assay of compound DCM-NH<sub>2</sub> at different concentration for MRC-5 (A) and MH-S (B) cells.

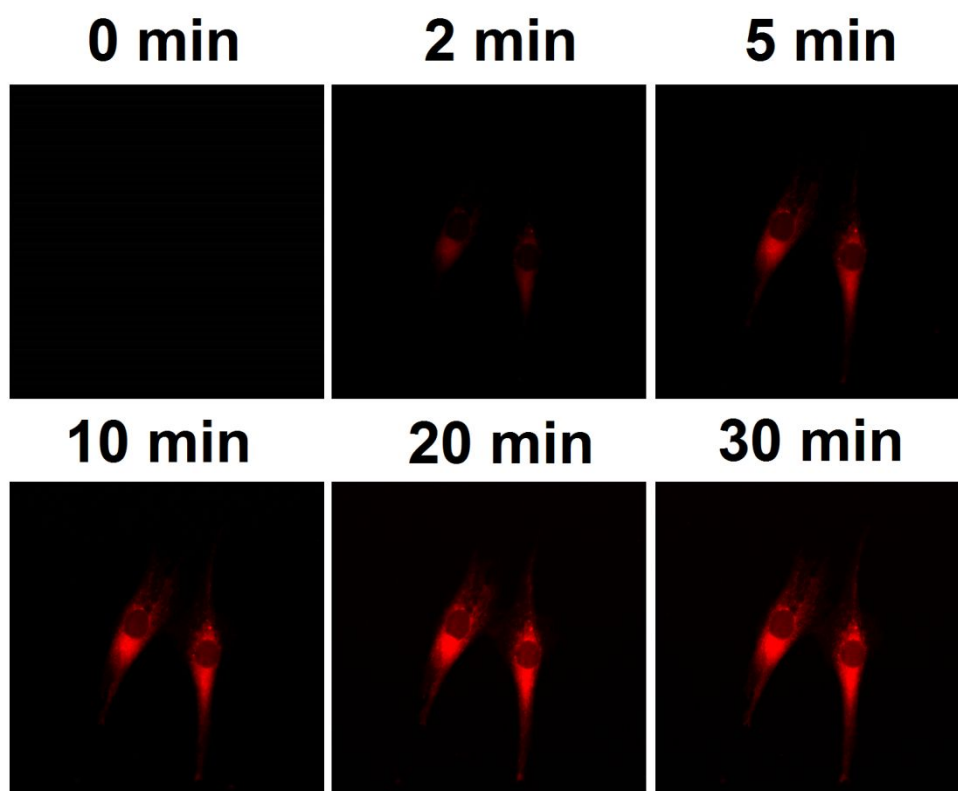

**Figure S8** Confocal fluorescence images of NO in IPF cell models at diverse time points: 0, 2, 5, 10, 20, and 30 min as control.

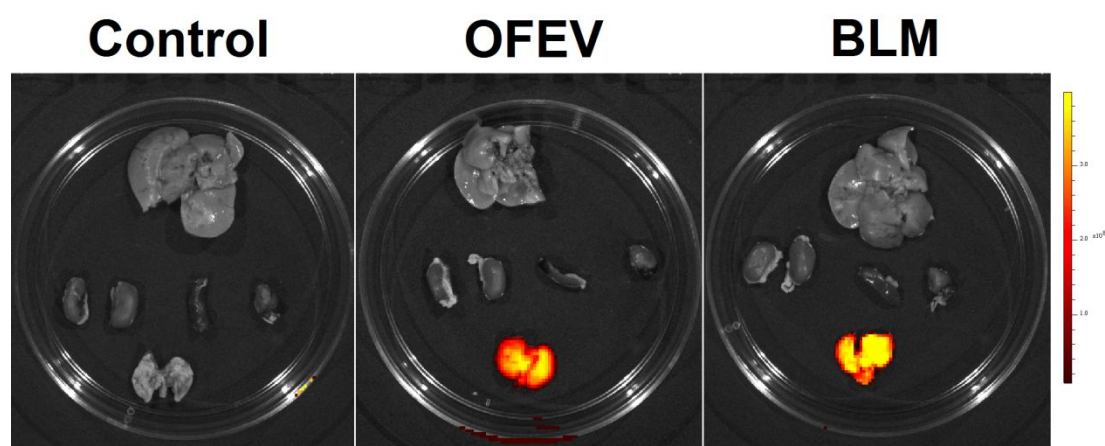

**Figure S9.** Images of isolated organs, involving heart, liver, spleen, lung, and kidney.

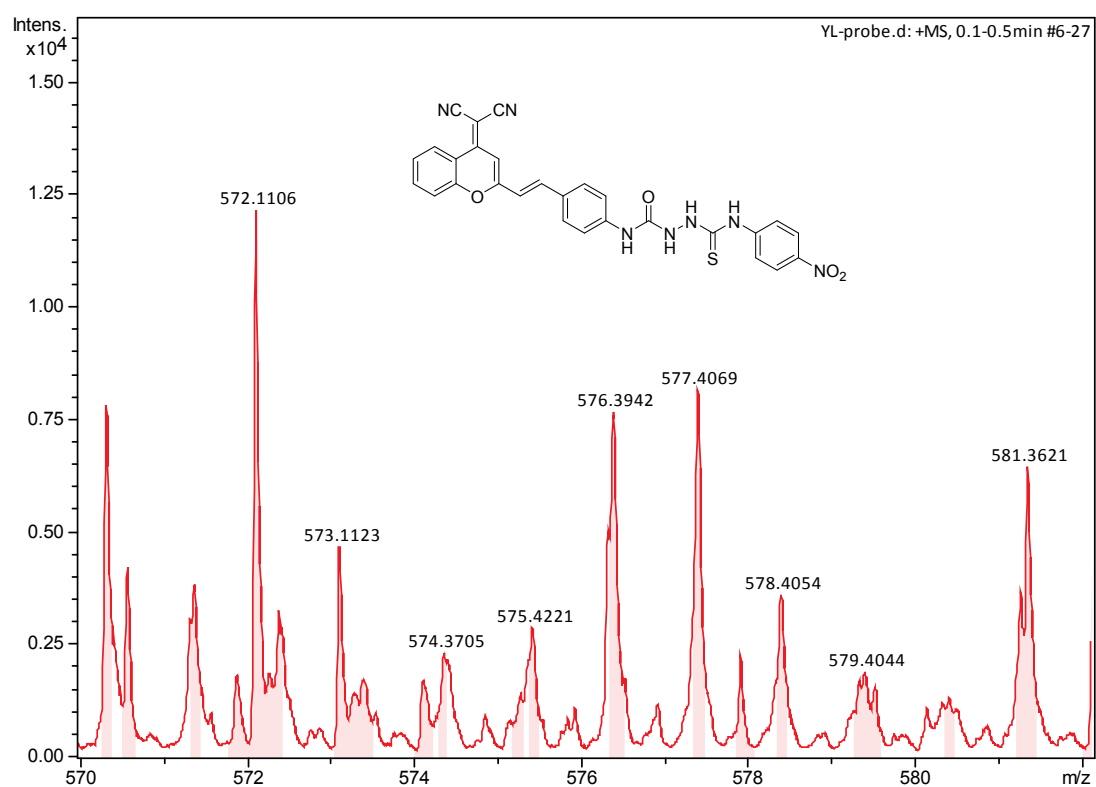

**Figure S10.** HRMS spectrum of probe DCM-NO.

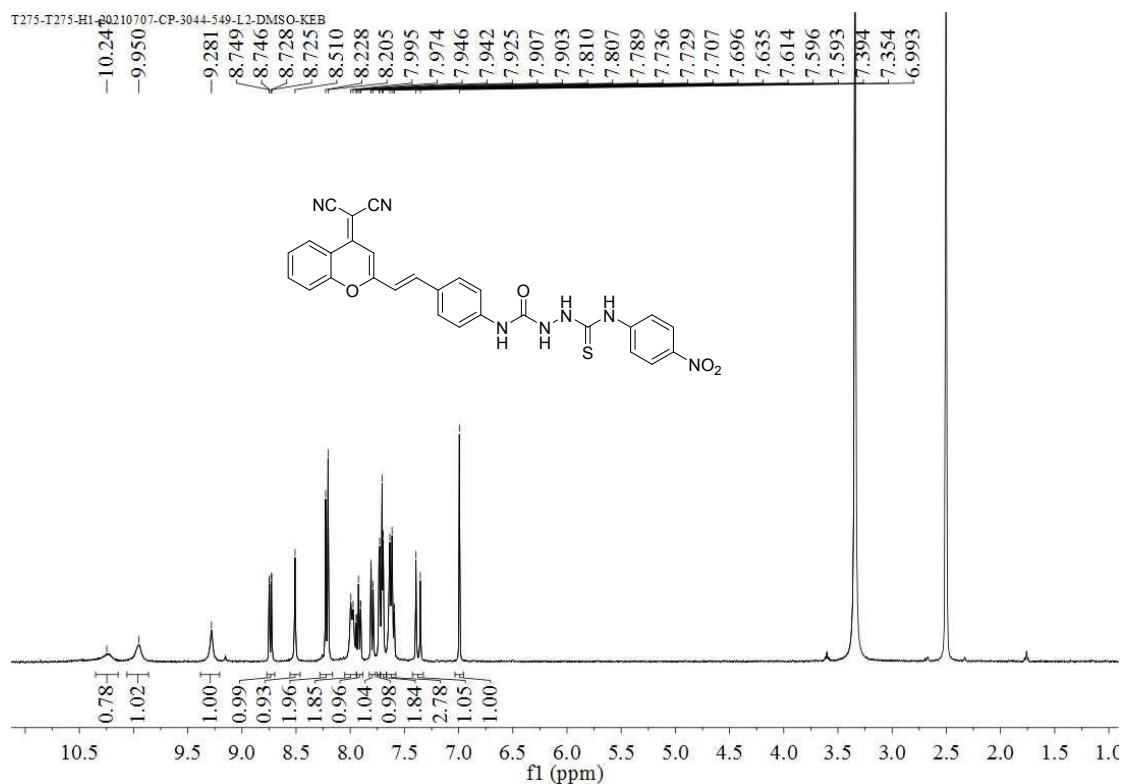

**Figure S11.** <sup>1</sup>H NMR spectrum of probe **DCM-NO** in DMSO-*d*<sub>6</sub>.

(1) Mao, Z.; Jiang, H.; Li, Z.; Zhong, C.; Zhang, W.; Liu, Z. An N-nitrosation reactivity-based two-photon fluorescent probe for the specific in situ detection of nitric oxide. *Chem. Sci.* **2017**, *8*, 4533-4538.
